# Supplementary material for: Novel A-π-D-π-A-type BODIPY dyads as small-molecule donors for solution-processed organic solar cells
Source: Royal Society of Chemistry journal article supplement (doi:10.1039/d1tc04981j), 2022-01-01
Supplement: d1tc04981j1.pdf [file d1tc04981j1.pdf]

# Supporting Information

## Novel A- $\pi$ -D- $\pi$ -A-type BODIPY dyads as small-molecule donor for solution-processed organic solar cells

Bao Xie,<sup>a</sup> Lunxiang Yin<sup>a</sup>, Junmei Fan<sup>b</sup>, Chang Liu<sup>a</sup> and Yanqin Li<sup>\*a</sup>

<sup>a</sup>*School of Chemical Engineering, Dalian University of Technology, Linggong Road 2, Dalian, P. R. China.*

*E-mail: liyanqin@dlut.edu.cn; Tel: +86-155-24572530.*

<sup>b</sup>*School of Mathematical Sciences, Dalian University of Technology, Linggong Road 2, Dalian, P. R. China.*

### Table of Contents

|                                                       |       |
|-------------------------------------------------------|-------|
| 1. Theoretical calculation                            | S1-S2 |
| 2. <sup>1</sup> H NMR and <sup>13</sup> C NMR spectra | S3-S6 |
| 3. Photovoltaic device fabrication                    | S7    |
| 4. Photovoltaic data                                  | S7    |
| 5. UV-vis absorption spectra of blend films           | S8    |
| 6. Study of charge recombination                      | S8-S9 |
| 7. References                                         | S9    |

# 1. Theoretical calculation

The design concept of BODIPY molecules is presented in **Fig. S1**. Density functional theory (DFT) and time-dependent density functional theory (TD-DFT) calculations were conducted by Gaussian 09 software at the B3LYP/6-31G(d) level.<sup>1</sup> The optimized geometries, frontier orbital energy levels, electronic density distributions and the predicted UV-vis absorption spectra of **CBDP**, **DCBDP**, **CTBDP** and **DCTBDP** are shown in **Fig. S2**. The calculated data of electronic transitions for these molecules are also summarized in **Table S1**.

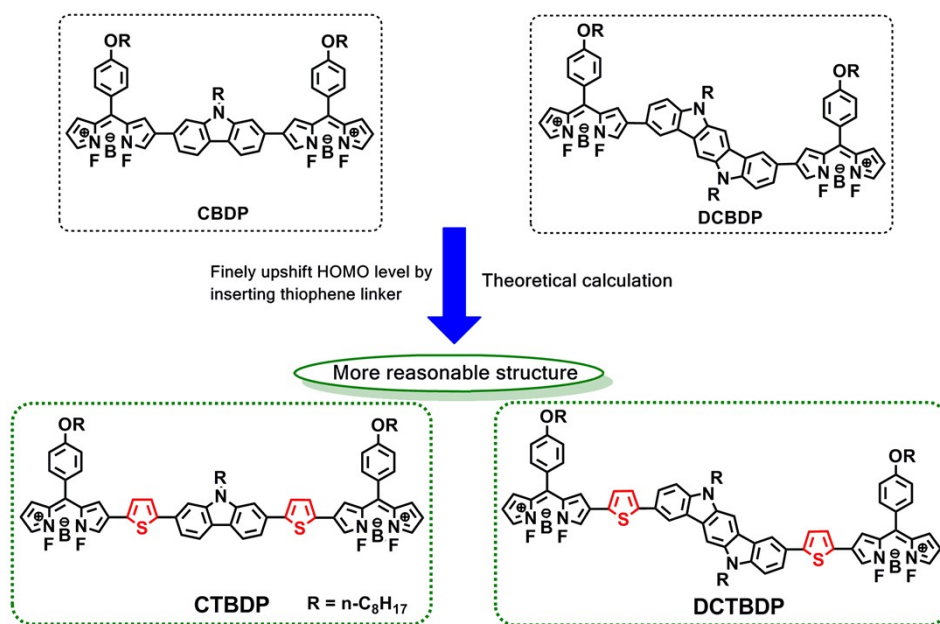

**Fig. S1** The design concept of BODIPY molecules with DFT calculation method.

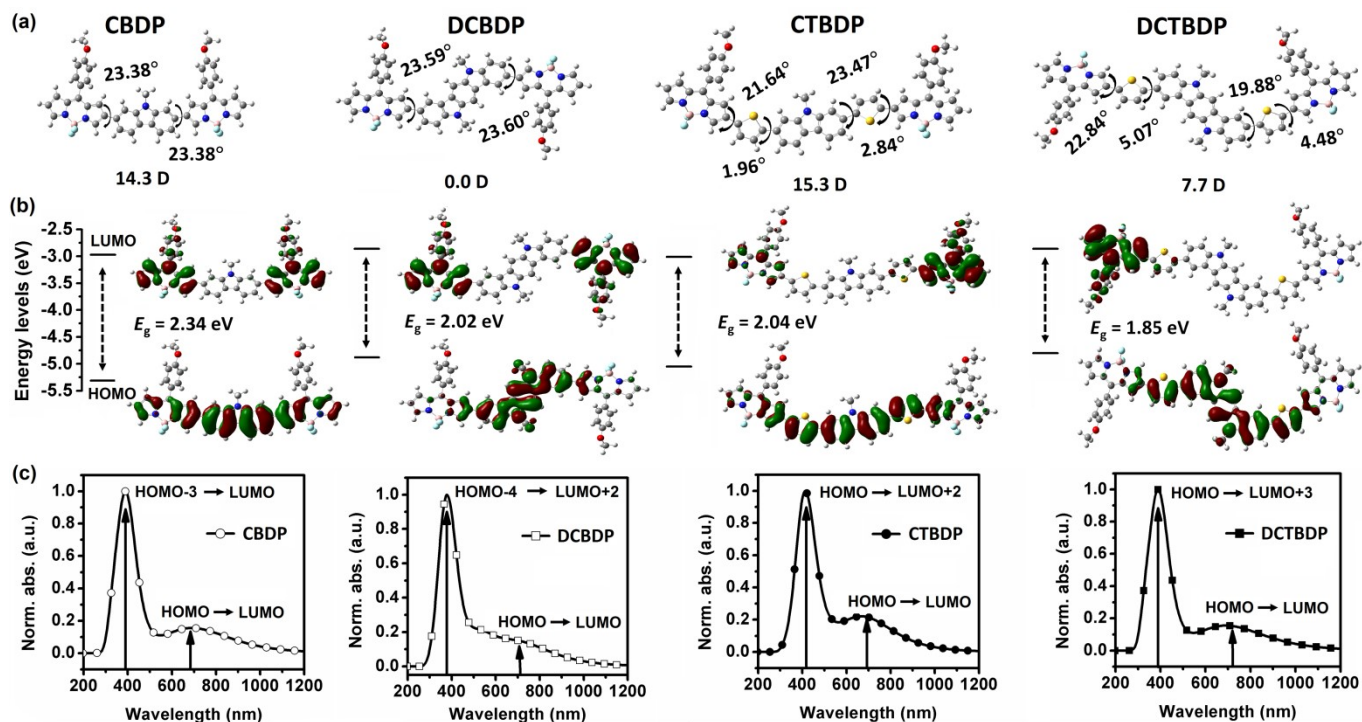

**Fig. S2** (a) The optimized geometries; (b) energy-level and electronic density distributions; (c) predicted UV-vis absorption spectra of **CBDP**, **DCBDP**, **CTBDP** and **DCTBDP** respectively.

**Table S1** The energy level, bandgap, dipole moment and total energy of **CBDP**, **DCBDP**, **CTBDP** and **DCTBDP** based on ground-state optimized configurations with DFT calculation.

| Molecule      | HOMO <sup>DFT</sup><br>(eV) | LUMO <sup>DFT</sup><br>(eV) | EDFT g<br>(eV) | Dipole moment<br>(Debye) | Total energy<br>( $\times 10^6$ kJ mol <sup>-1</sup> ) |
|---------------|-----------------------------|-----------------------------|----------------|--------------------------|--------------------------------------------------------|
| <b>CBDP</b>   | -5.31                       | -2.97                       | 2.34           | 14.3                     | -6.8                                                   |
| <b>DCBDP</b>  | -4.88                       | -2.86                       | 2.02           | 0.0                      | -7.7                                                   |
| <b>CTBDP</b>  | -5.05                       | -3.01                       | 2.04           | 15.3                     | -9.7                                                   |
| <b>DCTBDP</b> | -4.80                       | -2.95                       | 1.85           | 7.7                      | -10.6                                                  |

**Table S2** The electronic transitions for **CBDP**, **DCBDP**, **CTBDP** and **DCTBDP** with TD-DFT calculation.

| Molecule      | State | $E$ (eV) | $\lambda$ (nm) | $f$    | Composition                       |
|---------------|-------|----------|----------------|--------|-----------------------------------|
| <b>CBDP</b>   | S1    | 2.04     | 609            | 0.4902 | HOMO $\rightarrow$ LUMO (70%)     |
|               | S6    | 2.82     | 440            | 0.2448 | HOMO-2 $\rightarrow$ LUMO+1 (67%) |
|               | S8    | 3.14     | 394            | 0.3891 | HOMO-4 $\rightarrow$ LUMO (52%)   |
|               | S9    | 3.18     | 390            | 0.6872 | HOMO-3 $\rightarrow$ LUMO (66%)   |
|               | S11   | 3.41     | 363            | 0.2388 | HOMO-4 $\rightarrow$ LUMO+1 (53%) |
|               | S13   | 3.48     | 356            | 0.4499 | HOMO-6 $\rightarrow$ LUMO+1 (56%) |
|               | S20   | 3.93     | 315            | 0.3234 | HOMO $\rightarrow$ LUMO+2 (57%)   |
| <b>DCBDP</b>  | S1    | 1.72     | 721            | 0.2265 | HOMO $\rightarrow$ LUMO (70%)     |
|               | S5    | 2.36     | 526            | 0.2077 | HOMO-1 $\rightarrow$ LUMO+1 (69%) |
|               | S7    | 2.96     | 419            | 0.2441 | HOMO-3 $\rightarrow$ LUMO (66%)   |
|               | S9    | 3.15     | 394            | 0.3378 | HOMO-5 $\rightarrow$ LUMO (48%)   |
|               | S11   | 3.21     | 386            | 0.6903 | HOMO-4 $\rightarrow$ LUMO+2 (66%) |
|               | S14   | 3.43     | 362            | 0.3469 | HOMO-7 $\rightarrow$ LUMO (44%)   |
| <b>CTBDP</b>  | S1    | 1.78     | 695            | 0.4888 | HOMO $\rightarrow$ LUMO (69%)     |
|               | S7    | 2.90     | 428            | 1.6122 | HOMO $\rightarrow$ LUMO+2 (47%)   |
|               | S9    | 3.04     | 408            | 0.3071 | HOMO-3 $\rightarrow$ LUMO (40%)   |
|               | S10   | 3.09     | 401            | 0.4202 | HOMO-5 $\rightarrow$ LUMO+1 (47%) |
|               | S11   | 3.12     | 398            | 0.5389 | HOMO-5 $\rightarrow$ LUMO (35%)   |
| <b>DCTBDP</b> | S1    | 1.63     | 763            | 0.2614 | HOMO $\rightarrow$ LUMO (66%)     |
|               | S9    | 3.01     | 412            | 0.8450 | HOMO-4 $\rightarrow$ LUMO (52%)   |
|               | S13   | 3.11     | 398            | 0.2499 | HOMO $\rightarrow$ LUMO+2 (44%)   |
|               | S14   | 3.19     | 389            | 1.2934 | HOMO $\rightarrow$ LUMO+3 (43%)   |
|               | S27   | 3.72     | 334            | 0.5948 | HOMO-1 $\rightarrow$ LUMO+4 (43%) |

## 2. <sup>1</sup>H NMR and <sup>13</sup>C NMR spectra

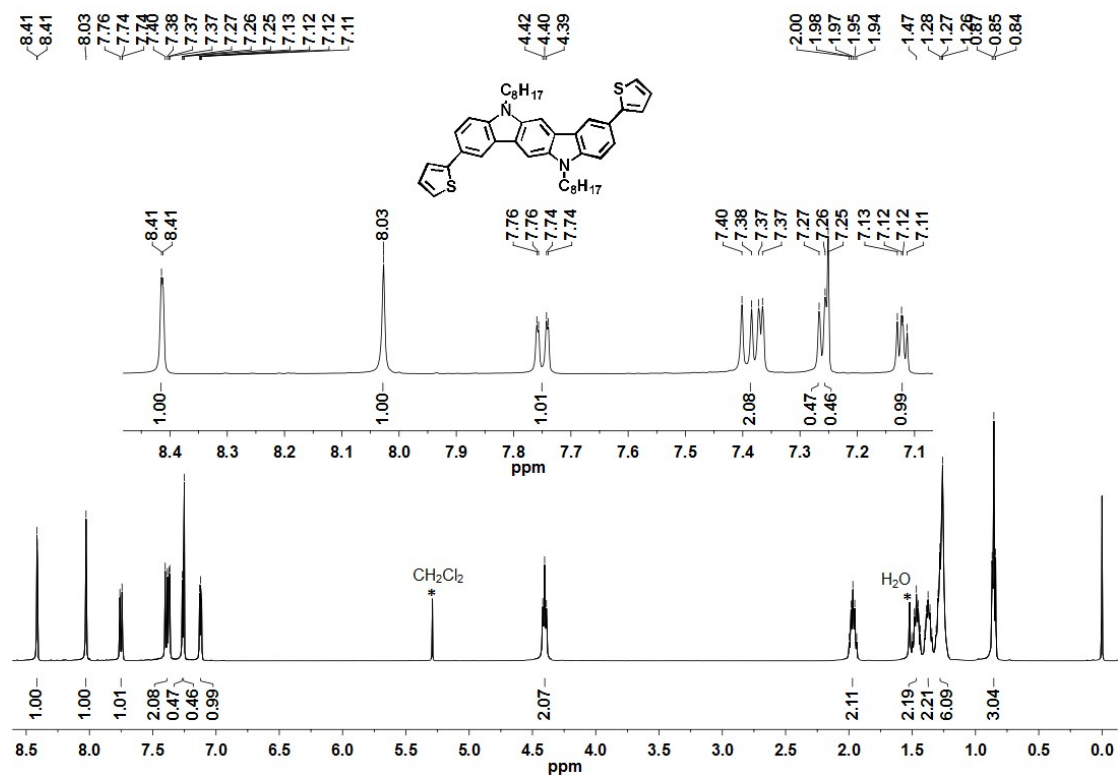

Fig. S3  $^1\text{H}$  NMR spectrum of compound 4

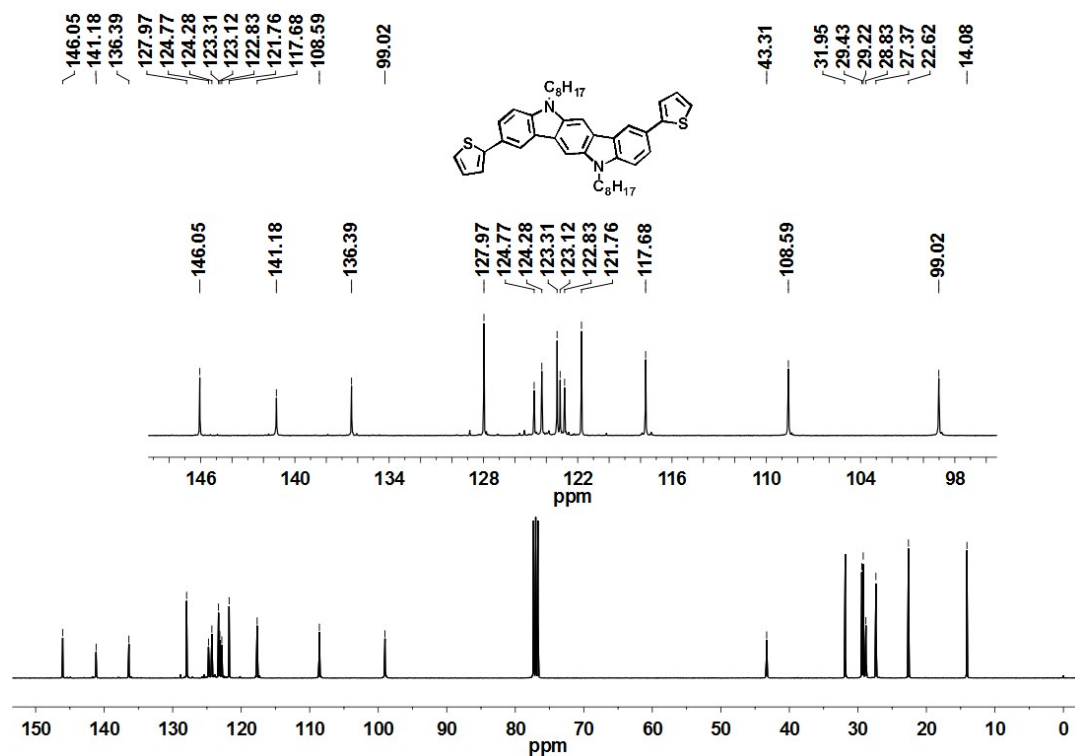

Fig. S4  $^{13}\text{C}$  NMR spectrum of compound 4

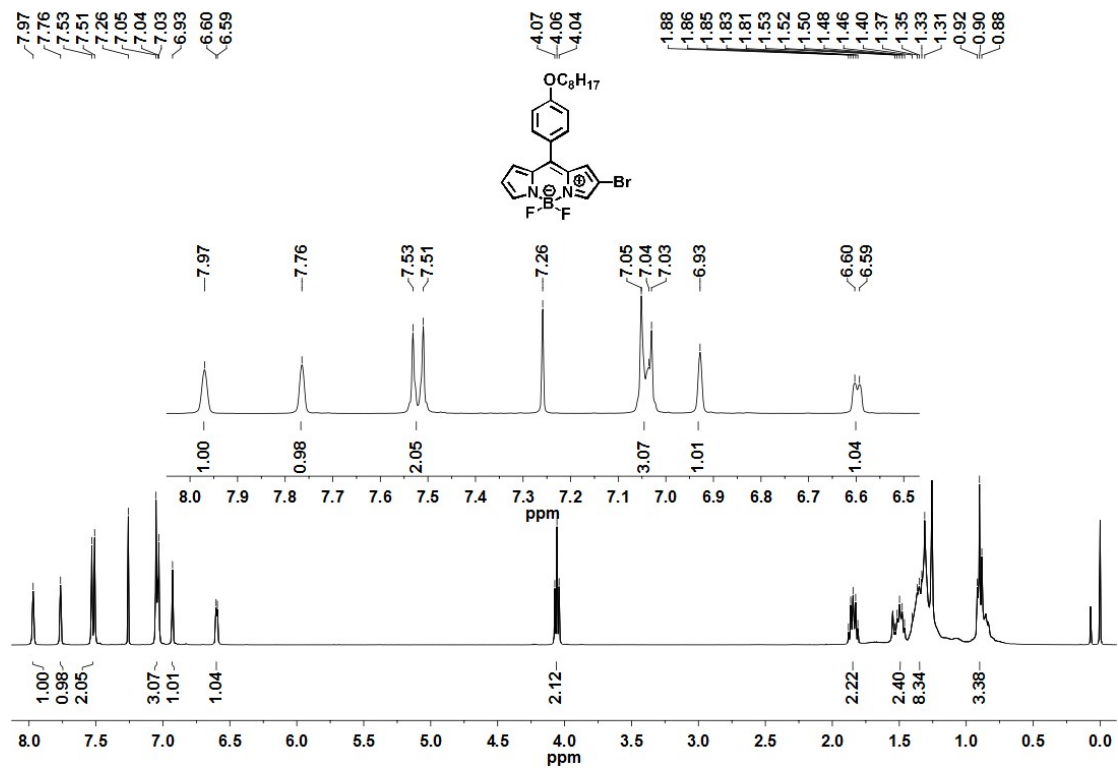

Fig. S5 <sup>1</sup>H NMR spectrum of compound 7

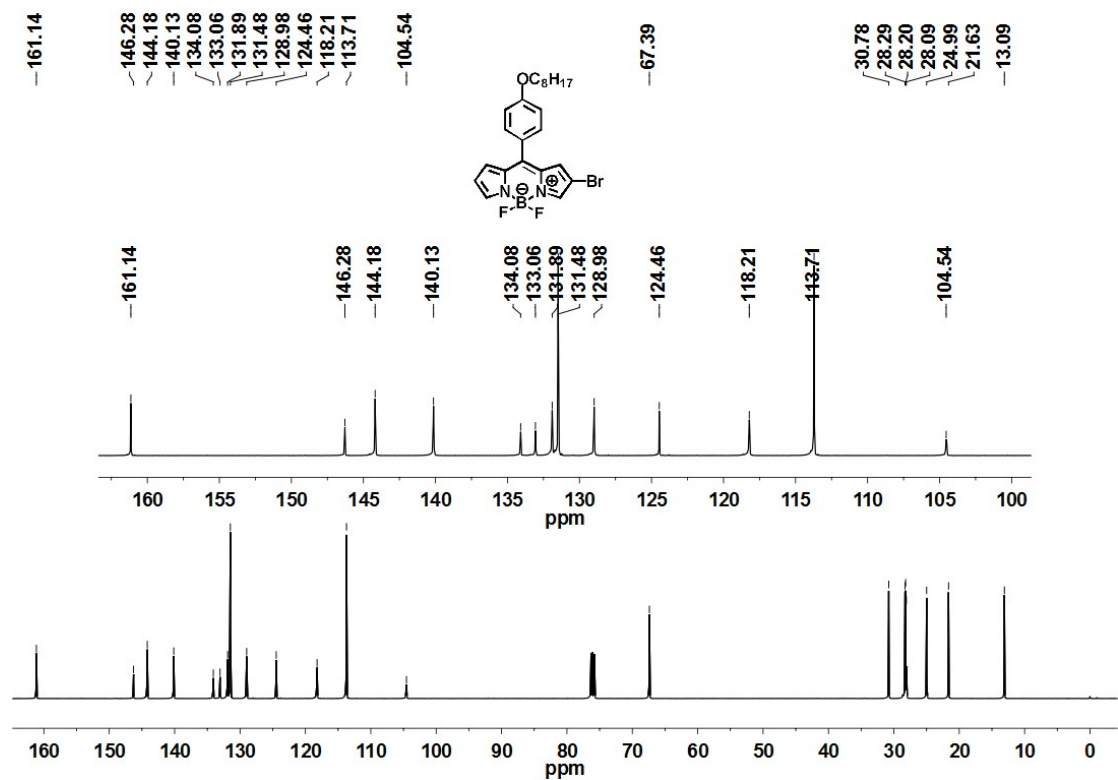

Fig. S6 <sup>13</sup>C NMR spectrum of compound 7



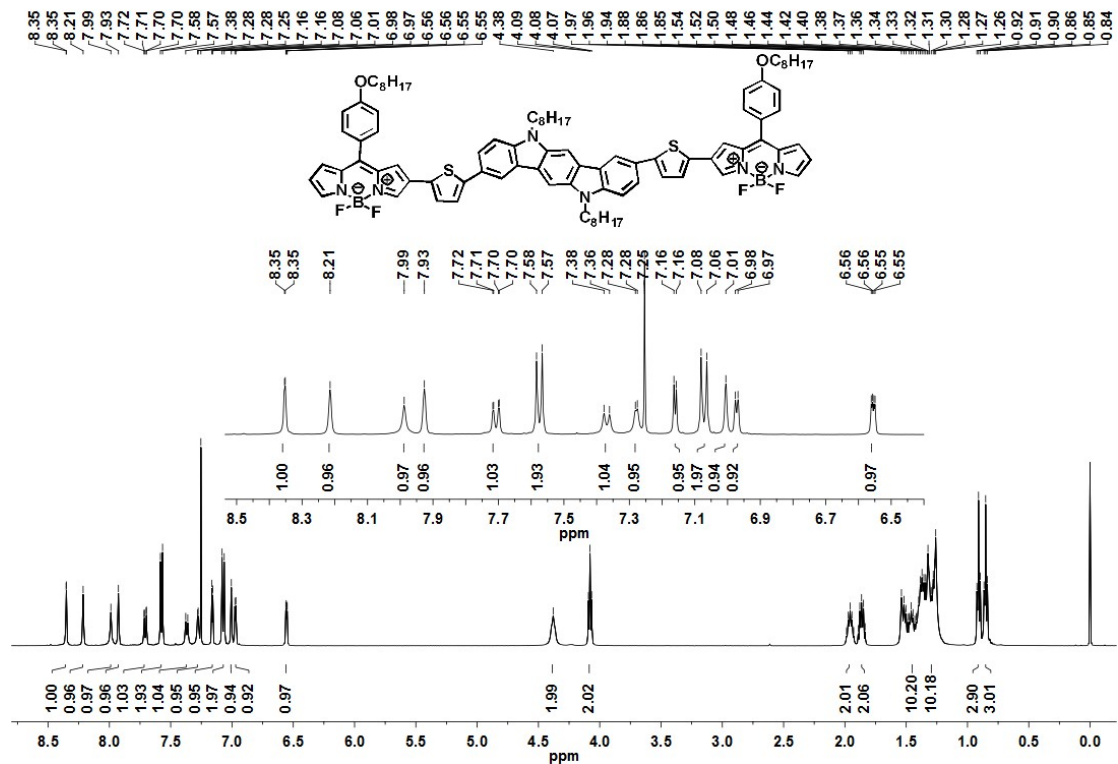

Fig. S9 <sup>1</sup>H NMR spectrum of DCTBDP

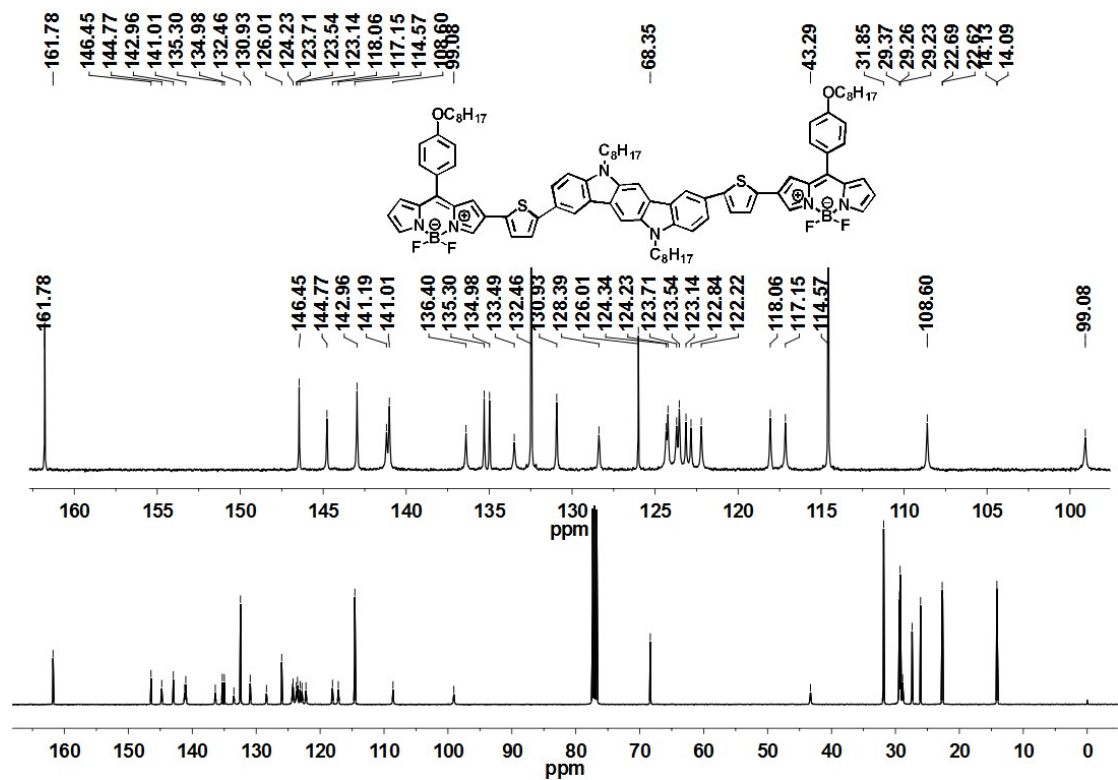

Fig. S10 <sup>13</sup>C NMR spectrum of DCTBDP

### 3. Photovoltaic device fabrication

The BHJ-OSCs were fabricated with a conventional device structure of ITO/PEDOT:PSS/SMDs:PC<sub>71</sub>BM/Al. The indium tin oxide (ITO) coated glass substrates (10 Ω sq<sup>-1</sup>) were cleaned with deionized water, methanol, acetone, toluene and iso-propyl alcohol, successively. Then poly(3,4-ethylenedioxythiophene):poly(styrene sulfonate) (PEDOT:PSS) as hole-transporting layer was spin-coated on the pre-cleaned ITO glass substrates at 4000 rpm for 60 s. Subsequently, the substrates were baked at 140 °C for 20 min in air and transferred to a N<sub>2</sub>-filled glove box. The solutions of **CTBDP** or **DCTBDP**:PC<sub>71</sub>BM (1:2, w/w) at total concentration 12 mg mL<sup>-1</sup> in chlorobenzene were stirred overnight at room temperature in N<sub>2</sub>-filled glove box, and then D/A blend solutions were spin-casted on the top of PEDOT:PSS layer at 800 rpm for 60 s. Next, the blend films were dried at 100 °C for 5 min so as to remove residual organic solvent, and the prepared samples were exposed or not to CH<sub>2</sub>Cl<sub>2</sub> vapor atmosphere at different duration. Finally, an aluminum (Al) cathode was deposited by vacuum thermal evaporation (*ca.* 10<sup>-4</sup> Pa) through a shadow mask, yielding eight individual OSCs with 5.0 mm<sup>2</sup> effective area. Hole-only and electron-only OSCs were fabricated with the same process, apart from gold (Au) as cathode and zinc oxide (ZnO) as electron buffer layer, respectively. As for ZnO layer fabrication, a dispersive solution of ZnO nanoparticles in iso-propyl alcohol (Aladdin reagent) was spun-cast on the top of ITO substrates at 3000 rpm for 60 s, and then were annealing at 165 °C for 1 h in air.

### 4. Photovoltaic data

**Table S3** PV data of the OSCs based on **CTBDP** and **DCTBDP**/PC<sub>71</sub>BM films under different conditions.

| Donor         | $J_{sc}$<br>(mA cm <sup>-2</sup> ) | $V_{oc}$<br>(V) | FF          | PCE <sub>max</sub> (PCE <sup>#</sup> <sub>ave.</sub> )<br>(%) |
|---------------|------------------------------------|-----------------|-------------|---------------------------------------------------------------|
| <b>CTBDP</b>  | 11.33                              | 0.91            | 0.29        | 3.02(2.59) <sup>a</sup>                                       |
|               | 15.69                              | 0.81            | 0.41        | 5.26(5.02) <sup>b</sup>                                       |
|               | <b>17.70</b>                       | <b>0.81</b>     | <b>0.41</b> | <b>5.85(5.28)<sup>c</sup></b>                                 |
|               | 14.90                              | 0.81            | 0.43        | 5.22(4.31) <sup>d</sup>                                       |
| <b>DCTBDP</b> | 12.88                              | 0.80            | 0.31        | 3.24(2.80) <sup>a</sup>                                       |
|               | <b>14.59</b>                       | <b>0.75</b>     | <b>0.35</b> | <b>3.85(3.57)<sup>b</sup></b>                                 |
|               | 13.43                              | 0.74            | 0.37        | 3.66(3.24) <sup>c</sup>                                       |
|               | 11.74                              | 0.55            | 0.37        | 2.39(2.02) <sup>d</sup>                                       |

# The average PCE is obtained from eight devices and all active-layer films are spin-casted from chlorobenzene solution (D/A=1:2, 12 mg/mL). For active layers: a----as-casted; b-d----CH<sub>2</sub>Cl<sub>2</sub> vapor treatment for 30, 45 and 60 s respectively.



## 5. UV-vis absorption spectra of blend films

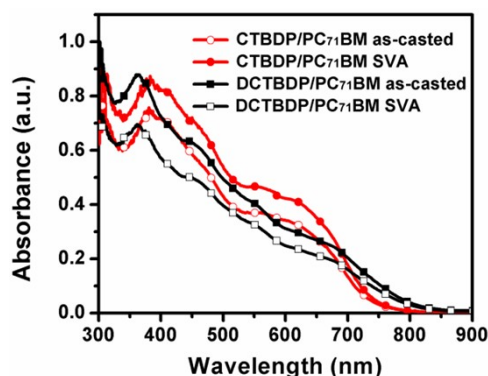

**Fig. S11** UV-vis absorption spectra of CTBDP and DCTBDP/PC<sub>71</sub>BM blend films (w/w, 1:2) under different conditions.

## 6. Study of charge recombination

The charge recombination in CTBDP and DCTBDP-based devices were further investigated by the dependence of  $J_{sc}$  and  $V_{oc}$  with light intensity ( $P_{in}$ ) (see **Fig. S12**). In general, the relationship between  $J_{sc}$  and  $P_{in}$  can be described as the power law: <sup>2</sup>

$$J_{sc} \propto (P_{in})^{\alpha}$$

in which  $\alpha$  is the power exponent and represents the degree of bimolecular recombination in OSCs. The large  $\alpha$  value from  $\lg J_{sc}$  versus  $\lg P_{in}$  curve means that bimolecular recombination process in OSCs at short circuit condition can be strongly suppressed. As shown in **Fig. S12(a)**, less bimolecular recombination was observed for the optimized CTBDP and DCTBDP-devices with slightly large  $\alpha$  values of 0.923 and 0.921, respectively in comparison with the as-casted counterparts.

Under the condition of only bimolecular combination, the  $V_{oc}$  of a solar cell is primarily determined by the following equation: <sup>3</sup>

$$V_{oc} = \frac{E_{gap}}{q} - \frac{kT}{q} \ln\left(\frac{(1 - P_D)\gamma N_c^2}{P_D G}\right)$$

where  $E_{gap}$  is the energy downshift between LUMO of the acceptor material and HOMO of the donor material;  $T$  is Kelvin temperature;  $k$  is Boltzmann constant;  $G$  refers to the generation rate of electron-hole pairs;  $P_D$  is the dissociation probability of electron-hole pairs;  $\gamma$  is the Langevin recombination constant and  $N_c$  is defined as effective density of states. Among them,  $P_D$  and  $N_c$  are independent of  $P$  while  $G$  is positively related to it. In principle, if bimolecular recombination is unique loss mechanism, the slope (S) of  $V_{oc}$  versus  $\ln P_{in}$  curve should be equal to unity  $kT/q$ . However, when Shockley-Read-Hall (SRH) recombination (namely trap-assisted recombination) is involved, the S value remains the range of  $1kT/q \sim 2kT/q$ . If S value is very close to  $2kT/q$ , the recombination mechanism would be dominated by monomolecular recombination. As shown in **Fig. S12(b)**, the optimized OSCs especially for CTBDP-device exhibit the significantly suppressed trap-assisted recombination with smaller S value of  $1.17kT/q$  among all OSCs, and therefore displaying better photovoltaic performance.

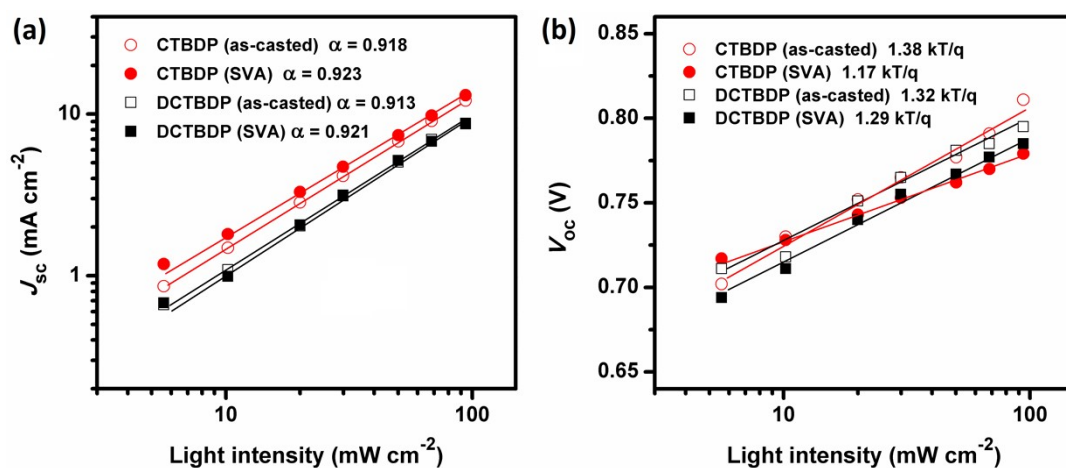

**Fig. S12** Variation of (a)  $J_{sc}$  and (b)  $V_{oc}$  with the light intensity (5.6-94 mW cm<sup>-2</sup>) for OSCs based on CTBDP and DCTBDP/PC<sub>71</sub>BM blend films under different conditions.

## 7. References

1. M. J. Frisch, G. W. Trucks, H. B. Schlegel, G. E. Scuseria, M. A. Robb, J. R. Cheeseman, G. Scalmani, V. Barone, B. Mennucci, G. A. Petersson, H. Nakatsuji, M. Caricato, X. Li, H. P. Hratchian, A. F. Izmaylov, J. Bloino, G. Zheng, J. L. Sonnenberg, M. Hada, M. Ehara, K. Toyota, R. Fukuda, J. Hasegawa, M. Ishida, T. Nakajima, Y. Honda, O. Kitao, H. Nakai, T. Vreven, J. A. Montgomery, Jr., J. E. Peralta, F. Ogliaro, M. Bearpark, J. J. Heyd, E. Brothers, K. N. Kudin, V. N. Staroverov, R. Kobayashi, J. Normand, K. Raghavachari, A. Rendell, J. C. Burant, S. S. Iyengar, J. Tomasi, M. Cossi, N. Rega, J. M. Millam, M. Klene, J. E. Knox, J. B. Cross, V. Bakken, C. Adamo, J. Jaramillo, R. Gomperts, R. E. Stratmann, O. Yazyev, A. J. Austin, R. Cammi, C. Pomelli, J. W. Ochterski, R. L. Martin, K. Morokuma, V. G. Zakrzewski, G. A. Voth, P. Salvador, J. J. Dannenberg, S. Dapprich, A. D. Daniels, O. Farkas, J. B. Foresman, J. V. Ortiz, J. Cioslowski, and D. J. Fox, Gaussian, Inc., Wallingford CT, 2009.
2. (a) F. Liu, H. Fan, Z. Zhang and X. Zhu, *ACS Appl. Mater. Interfaces*, 2016, **8**, 3661-3668; (b) L. Tanguy, P. Malhotra, S. P. Singh, G. Brisard, G. D. Sharma and P. D. Harvey, *ACS Appl. Mater. Interfaces*, 2019, **11**, 28078-28087.
3. W. Gao, M. Zhang, Z. Chen, X. Liu, K. Zheng, C. Zhong, F. Zhang and C. Yang, *J. Mater. Chem. C*, 2019, **7**, 10111-10118.
